# Supplementary material for: Biodegradable magnesium Herbert screw – image quality and artifacts with radiography, CT and MRI
Source: Springer Nature journal article supplement (doi:10.1186/s12880-017-0187-7), 2017-02-14
Supplement: MOESM1 [file 12066052]

Mg 0°

| Scan number   | MDCT | FPCT     | MRI 1.5T (Avanto) |              | MRI 3T (Skyra) |              |              |
|---------------|------|----------|-------------------|--------------|----------------|--------------|--------------|
|               |      |          | PDw TSE (FS)      | T1w TSE (FS) | PDw TSE (FS)   | T1w TSE (FS) | PDw TSE (FS) |
| 1             | 0    | 5.5      | 4.1               | 3.4          | 4.9            | 4.7          | 5.2          |
|               | 0    | 5.5      | 4.2               | 3.3          | 4.9            | 4.6          | 5            |
|               | 0    | 5.4      | 3.9               | 3.2          | 4.9            | 4.6          | 5.1          |
| 2             | 0    | 5.7      | 4.8               | 3.5          | 4.5            | 4            | 4.4          |
|               | 0    | 5.8      | 4.8               | 3.4          | 4.6            | 3.9          | 4            |
|               | 0    | 5.9      | 4.8               | 3.3          | 4.4            | 3.8          | 4.3          |
| 3             | 0    | 6        | 5.3               | 4.2          | 5.3            | 4.5          | 5            |
|               | 0    | 6.1      | 4.8               | 4.1          | 5.2            | 4.4          | 5            |
|               | 0    | 6        | 4.9               | 4            | 5.3            | 4.3          | 5.1          |
| 4             | 0    | 5.5      | 5                 | 3            | 4.4            | 4.8          | 4.6          |
|               | 0    | 5.6      | 5                 | 3            | 4.1            | 4.8          | 4.5          |
|               | 0    | 5.7      | 5.1               | 3.2          | 4.3            | 4.9          | 4.7          |
| 5             | 0    | 5.3      | 3.8               | 3.9          | 4.9            | 4.5          | 4.6          |
|               | 0    | 5.4      | 4                 | 3.8          | 4.7            | 4.5          | 4.7          |
|               | 0    | 5.5      | 3.9               | 3.8          | 4.7            | 4.6          | 4.7          |
|               | 0    | 5.66     | 4.56              | 3.54         | 4.74           | 4.46         | 4.72666667   |
|               | 0    | 0.241661 | 0.49504209        | 0.38262253   | 0.35175749     | 0.32         | 0.32957886   |
| Starie result | 0    | 6.3      |                   |              | 4.3            | 3.9          | 4.1          |

Ti 0°

| WARP           | Scan number | MDCT     | FPCT     | MRI 1.5T (Avanto) |              |
|----------------|-------------|----------|----------|-------------------|--------------|
|                |             |          |          | PDw TSE (FS)      | T1w TSE (FS) |
|                | 1           | 15.8     | 15.1     | 6.2               | 5.3          |
|                |             | 15.7     | 15.1     | 6.2               | 5.3          |
|                |             | 15.6     | 15.3     | 6.1               | 5.2          |
|                | 2           | 13.9     | 14.1     | 6.4               | 5.2          |
|                |             | 13.8     | 14.3     | 6.3               | 5.1          |
|                |             | 13.9     | 13.9     | 6.3               | 5.2          |
|                | 3           | 12.4     | 14.5     | 6.3               | 5            |
|                |             | 12.6     | 14.6     | 6.3               | 5.1          |
|                |             | 12.5     | 14.4     | 6.4               | 5.2          |
|                | 4           | 13       | 13.2     | 5.9               | 5.5          |
|                |             | 13.1     | 13.2     | 5.8               | 5.4          |
|                |             | 13.2     | 13.3     | 6                 | 5.6          |
|                | 5           | 15.2     | 13.6     | 6.2               | 5.5          |
|                |             | 15.4     | 13.5     | 6.1               | 5.7          |
|                |             | 15.2     | 13.7     | 6.2               | 5.7          |
| Mittelwert     |             | 14.08667 | 14.12    | 6.18              | 5.33333333   |
| Std.Abweichung |             | 1.230104 | 0.685274 | 0.168126936       | 0.21499354   |
|                |             |          | 7.5      |                   | 17.3         |

**MRI 3T (Skyra)*****PDw TSE (FS) T1w TSE (FS) PDw TSE (FS) WARP***

|     |     |     |
|-----|-----|-----|
| 8.6 | 8.2 | 8.9 |
| 8.6 | 8.1 | 8.8 |
| 8.5 | 8   | 8.7 |
| 8.9 | 7.9 | 8.6 |
| 8.8 | 8   | 8.5 |
| 8.7 | 8.1 | 8.3 |
| 8.4 | 8   | 8.3 |
| 8.3 | 8.1 | 8.2 |
| 8.1 | 8.2 | 8.1 |
| 8.6 | 8.1 | 8.5 |
| 8.7 | 8.2 | 8.4 |
| 8.8 | 8.3 | 8.3 |
| 8.9 | 8.3 | 8.6 |
| 8.8 | 8.4 | 8.6 |
| 8.8 | 8.5 | 8.5 |

|            |      |          |            |
|------------|------|----------|------------|
| 8.63333333 | 8.16 | 8.486667 | Mittelwert |
|------------|------|----------|------------|

|            |            |          |                |
|------------|------------|----------|----------------|
| 0.22110832 | 0.15832456 | 0.215613 | Std.Abweichung |
|------------|------------|----------|----------------|

|     |     |     |
|-----|-----|-----|
| 7.5 | 5.9 | 5.6 |
|-----|-----|-----|
